# Supplementary material
Source: Springer Nature journal article supplement (https://www.springermedizin.de/resource/supplementary/13063_2014_2179_MOESM1_ESM.pdf/9621546)

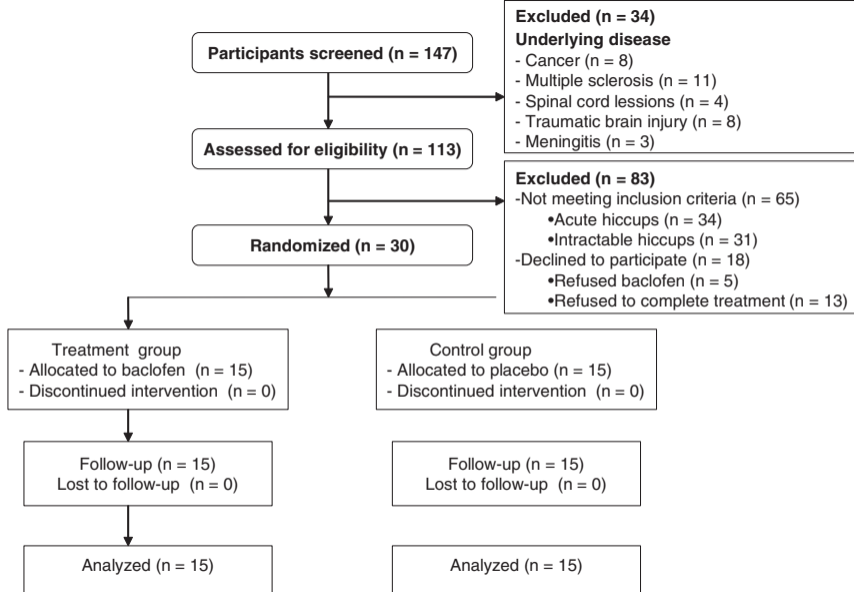

Supplement: MOESM1 [file 9621546]
